# Supplementary material for: Single-Cell RNA-Seq Dissects the Heterogeneity of Human Microglial Related to Alzheimer’s Disease Based on Gene Regulatory Networks
Source: Research Square preprint supplement (doi:10.21203/rs.3.rs-1411661/v1), 2022-03-11
Supplement: Supplementary file 1 [file fa2c5ea697cb0237ccbcd6c3.xlsx]

## Sheet: Table3
Table3 Metabolic pathway enrichment analysis results of cluster 5 and 16
Cluster	Pathway	Counts	Genes	Pvalue
Cluster5	Prion diseases	3	IL1A,HSPA5,IL1B	0.003
	Glycolysis / Gluconeogenesis	3	ALDH2,ENO1,GAPDH	0.011
	Complement and coagulation cascades	3	SERPINA1,C5AR1,A2M	0.012
	Salmonella infection	3	IL1A,IL1B,CCL3	0.017
	Cytokine-cytokine receptor interaction	4	CX3CR1,IL1A,IL1B,CCL3	0.02
	HIF-1 signaling pathway	3	TIMP1,ENO1,GAPDH	0.022
	Biosynthesis of antibiotics	3	ALDH2,ENO1,GAPDH	0.054
Cluster16	Alzheimer's disease	19	APP,LRP1,ADAM10,LPL,PSEN1,HSD17B10,TNF,TNFRSF1A,APH1A,PPP3CA,ADAM17,NCSTN,IL1B,CASP3,MAPK1,CAPN1,APOE, GAPDH, SNCA	1.74e-10
	NOD-like receptor signaling pathway	9	HSP90AA1,CXCL8,IL1B,CARD8,IL18,MAPK1,CCL2,MAPK14,TNF	3.05e-06
	HIF-1 signaling pathway	10	MAP2K1,CDKN1B,HMOX1,MAPK1,TIMP1,ENO1,GAPDH,TLR4,HK1,VEGFA	2.48e-05
	Pathways in cancer	19	ITGB1,MAP2K1,HSP90AA1,TGFB1,CDKN1B,CXCL8,PTGER2, GSTP1,TGFBR2,VEGFA,RXRA,CASP3,GNAS,BAX,MAPK1,CTNNB1,ITGAV,PPARG,RAF1	6.32e-05
	Toll-like receptor signaling pathway	8	MAP2K1,CXCL8,IL1B,CCL3,MAPK1,MAPK14,TNF,TLR4	0.0017
	Cytokine-cytokine receptor interaction	11	IL10,TGFB1,CXCL8,IL1B,IL18,CCL3,CCL2,TNFRSF1B,TNF,TGFBR2,TNFRSF1A	0.0064
	MAPK signaling pathway	11	PPP3CA,MAP2K1,TGFB1,IL1B,CASP3,MAPK1,RAF1,MAPK14,TNF,TGFBR2,TNFRSF1A	0.084
	NF-kappa B signaling pathway	5	CXCL8,IL1B,TNF,TLR4,TNFRSF1A	0.045
